# Supplementary material for: Quantitative analysis of acetylation in peste des petits ruminants virus-infected Vero cells
Source: Virol J. 2023 Oct 10;20:227. doi: 10.1186/s12985-023-02200-1 (PMC10563215; doi:10.1186/s12985-023-02200-1)
Supplement: Supplementary file 5 — Additional file 5: Tables S3. Classification of differentially acetylated proteins [file 12985_2023_2200_MOESM5_ESM.xlsx]

## Sheet: GO classify
GO Terms Level 1	GO Terms Level 2	No. of Protein
Biological Process	cellular process	125
	metabolic process	109
	single-organism process	58
	biological regulation	21
	cellular component organizatio...	16
	localization	15
	response to stimulus	13
	other	6
Cellular Component	cell	84
	organelle	66
	macromolecular complex	51
	membrane	18
	membrane-enclosed lumen	5
	other	3
Molecular Function	binding	178
	catalytic activity	91
	structural molecule activity	25
	other	13

## Sheet: subcellular location
Subcellular Location	No. of Protein
cytoplasm	118
nucleus	70
mitochondria	41
extracellular	18
endoplasmic reticulum	10
cytoplasm,nucleus	8
plasma membrane	6
other	5

## Sheet: COG classify
COG/KOG category	Category description	No. of Protein
INFORMATION STORAGE AND PROCESSING	[J] Translation, ribosomal structure and biogenesis	32
	[A] RNA processing and modification	32
	[K] Transcription	10
	[L] Replication, recombination and repair	11
	[B] Chromatin structure and dynamics	14
CELLULAR PROCESSES AND SIGNALING	[D] Cell cycle control, cell division, chromosome partitioning	9
	[Y] Nuclear structure	6
	[V] Defense mechanisms	3
	[T] Signal transduction mechanisms	16
	[Z] Cytoskeleton	14
	[W] Extracellular structures	2
	[U] Intracellular trafficking, secretion, and vesicular transport	18
	[O] Posttranslational modification, protein turnover, chaperones	49
METABOLISM	[C] Energy production and conversion	12
	[G] Carbohydrate transport and metabolism	12
	[E] Amino acid transport and metabolism	7
	[F] Nucleotide transport and metabolism	3
	[H] Coenzyme transport and metabolism	2
	[I] Lipid transport and metabolism	14
	[P] Inorganic ion transport and metabolism	7
	[Q] Secondary metabolites biosynthesis, transport and catabolism	2
POORLY CHARACTERIZED	[R] General function prediction only	27
	[S] Function unknown	4
